# Supplementary material
Source: Springer Nature journal article supplement (https://www.springermedizin.de/resource/supplementary/12883_2011_506_MOESM10_ESM.pdf/9455290)
Supplement: MOESM10 [file 9455290]

|     |                    |                          |                          |                           |                         |                          |     |
|-----|--------------------|--------------------------|--------------------------|---------------------------|-------------------------|--------------------------|-----|
| 1   | MKALRLSASA         | LFCLLLINGL               | GAAPPGRPEA               | QPPPLSSEHK                | EPVAGDAVPG              | PKDGSAPEVR               | 60  |
| 61  | <b>GARNSEPQDE</b>  | <b>GELFQGVDP</b>         | <b>ALAAVLLQAL</b>        | <b>DRPASPPAPS</b>         | <b>GSQQGP EEEA</b>      | <b>AEALLTETVR</b>        | 120 |
| 121 | <b>SQTHSLPAPE</b>  | <b>SPEPAAPRP</b>         | <b>QTPENGPEAS</b>        | <b>DPSEELEALA</b>         | <b>SLLQELRDFS</b>       | <b>PSSAKRQQET</b>        | 180 |
| 181 | <b>AAAE TETRTH</b> | <b>TLTRVNLESP</b>        | <b>GPERVWRASW</b>        | <b>GEFQARVPER</b>         | <b>APLPPPAPSQ</b>       | <b>FQARMPSGP</b>         | 240 |
| 241 | <b>LPETHKFGEG</b>  | <b>VSSPKTHLGE</b>        | <b>ALAPLSKAYQ</b>        | <b>GVAAPFPKAR</b>         | <b>RPESALLGGS</b>       | <b>EAGERLLQQG</b>        | 300 |
| 301 | <b>LAQVEAGRRQ</b>  | <b>AEATRQAAAQ</b>        | <b>EERLADLASD</b>        | <b>LLLOYLLQGG</b>         | <b>ARQRGLGGRG</b>       | <b>LQEAAEERES</b>        | 360 |
| 361 | <b>AREEEAEQE</b>   | <b><u>RRGGEERVGE</u></b> | <b><u>EDEEAAEAEA</u></b> | <b><u>EAE EAERARQ</u></b> | <b><u>NALLFAEED</u></b> | <b><u>GEAGAED</u>KRS</b> | 420 |
| 421 | <b>QEETPGHRRK</b>  | <b>EAEGTEEGGE</b>        | <b>EEDDEEMDPQ</b>        | <b>TIDSLIELST</b>         | <b>KLHLPADDVV</b>       | <b>SIIEEVEEKR</b>        | 480 |
| 481 | <b>KRKKNAPPEP</b>  | <b>VPPPRAAPAP</b>        | <b>THVRSPPPPP</b>        | <b>PAPAPARDEL</b>         | <b>PDWNEVLPPW</b>       | <b>DREEDEVYPP</b>        | 540 |
| 541 | <b>GPYHPFPNYI</b>  | <b>RPRTLQPPSA</b>        | <b>LRRRHYPHAL</b>        | <b>PPSRHYPGRE</b>         | <b>AQARRAQEEA</b>       | <b>EAEERRLQEQ</b>        | 600 |
| 601 | <b>EELENYIEHV</b>  | <b>LLRRP</b>             |                          |                           |                         |                          | 615 |
